# Supplementary material
Source: Springer Nature journal article supplement (https://www.springerprofessional.de/resource/supplementary/13638_2012_767_MOESM9_ESM.pdf/11898388)

(a)  $\rho$ 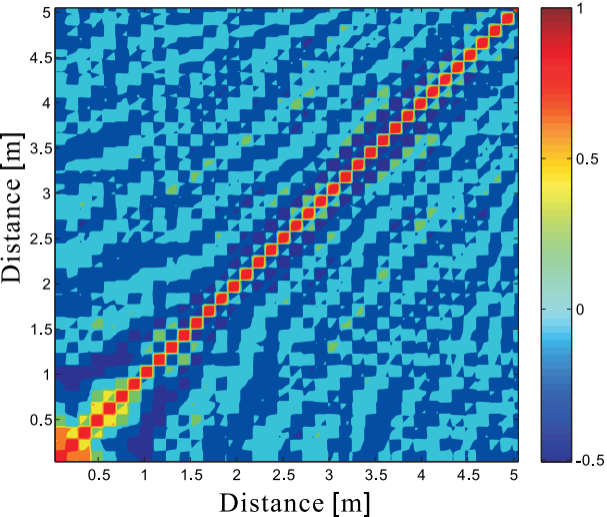(b)  $\rho_{\text{cmd}}$ 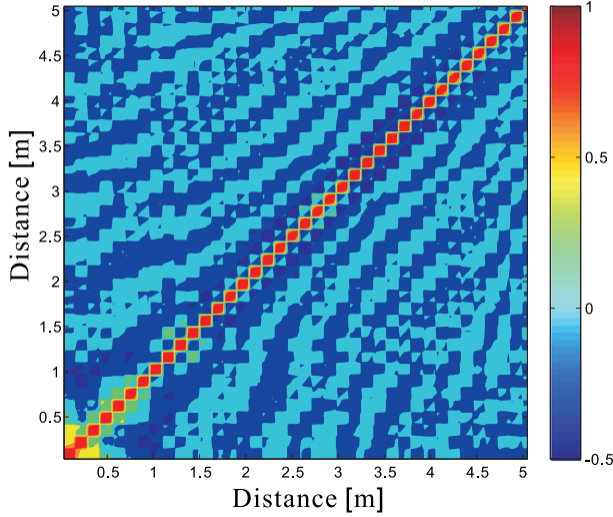

Supplement: MOESM9 [file 11898388]
